# Supplementary material for: Topological control of metal–organic frameworks toward highly sensitive and selective detection of chromate and dichromate
Source: Royal Society of Chemistry journal article supplement (doi:10.1039/d2qi02631g), 2023-01-01
Supplement: d2qi02631g1.pdf [file d2qi02631g1.pdf]

Supplementary Information for

## **Topological control of metal–organic frameworks towards highly sensitive and selective detection of chromate and dichromate**

Zi-Jian Li,<sup>a</sup> Yu Ju,<sup>a,c</sup> Xiao-Ling Wu,<sup>a</sup> Xiaoyun Li,<sup>a</sup> Jie Qiu,<sup>b</sup> Yongxin Li,<sup>d</sup> Zhi-Hui Zhang,<sup>c</sup> Ming-Yang He,<sup>c</sup> Linjuan Zhang,<sup>a</sup> Jian-Qiang Wang,<sup>a</sup> and Jian Lin<sup>\*,b</sup>

<sup>a</sup>Key Laboratory of Interfacial Physics and Technology, Shanghai Institute of Applied Physics, Chinese Academy of Sciences, Shanghai 201800, China.

<sup>b</sup>School of Nuclear Science and Technology, Xi'an Jiaotong University, No.28, West Xianning Road, Xi'an, 710049, P. R. China. E-mail: jianlin@xjtu.edu.cn

<sup>c</sup>Jiangsu Key Laboratory of Advanced Catalytic Materials and Technology, Changzhou University, Changzhou 213164, China

<sup>d</sup>Division of Chemistry and Biological Chemistry, School of Physical and Mathematical Sciences, Nanyang Technological University, 637371, Singapore

\*Co-corresponding authors

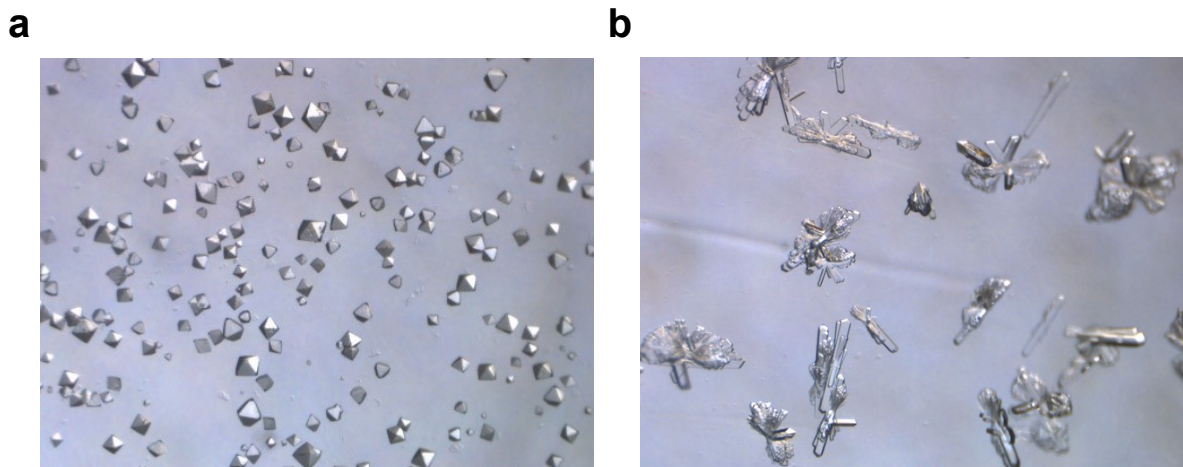

Fig. S1 Crystal images of (a) Th-BCTPE-1 and (b) Th-BCTPE-2.

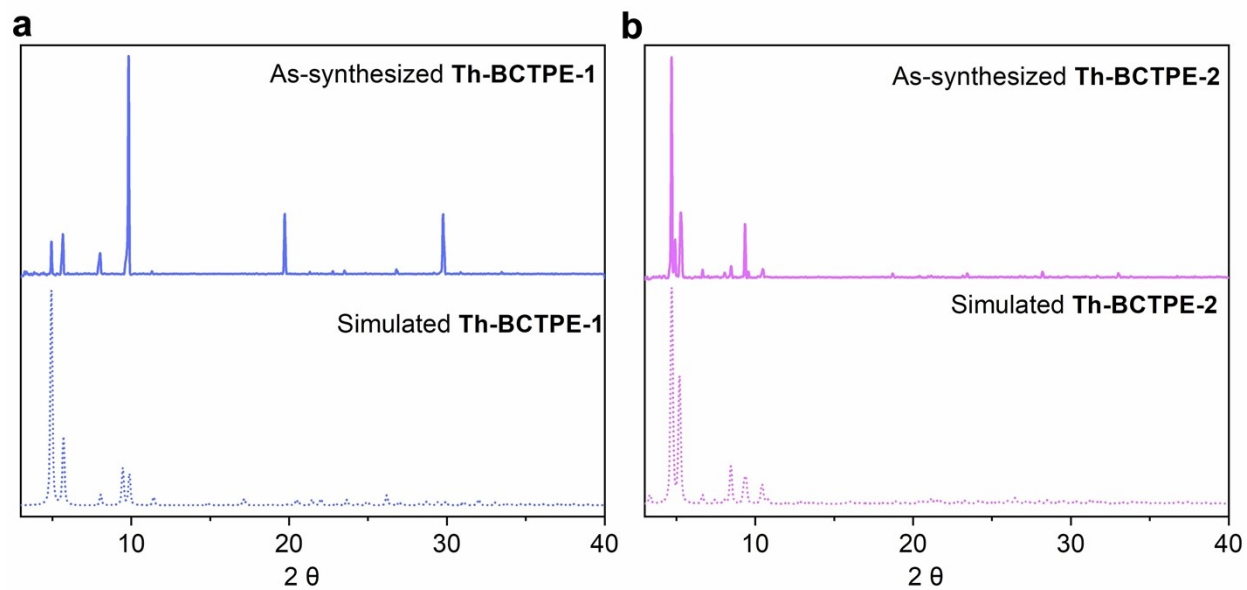

Fig. S2 Powder X-ray diffraction patterns of as-synthesized and simulated (a) Th-BCTPE-1 and (b) Th-BCTPE-2.

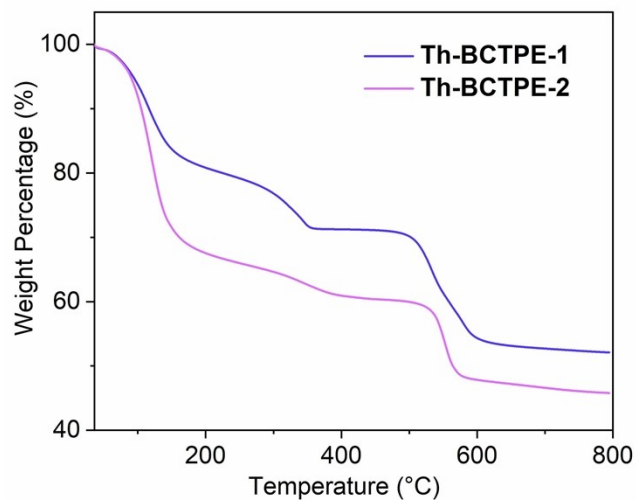

**Fig. S3** Thermogravimetric analysis (TGA) curves of **Th-BCTPE-1** and **Th-BCTPE-2**.

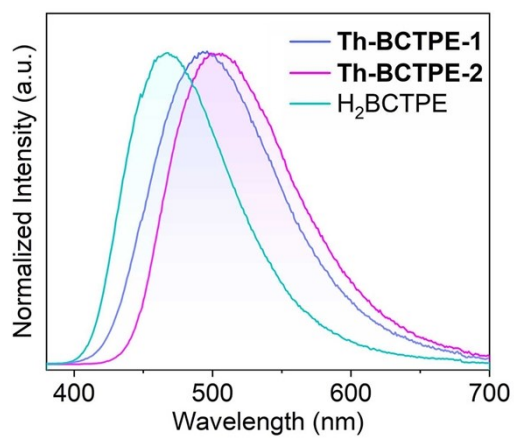

**Fig. S4** Photoluminescence spectra of **Th-BCTPE-1**, **Th-BCTPE-2**, and **H<sub>2</sub>BCTPE** under 365 UV excitation.

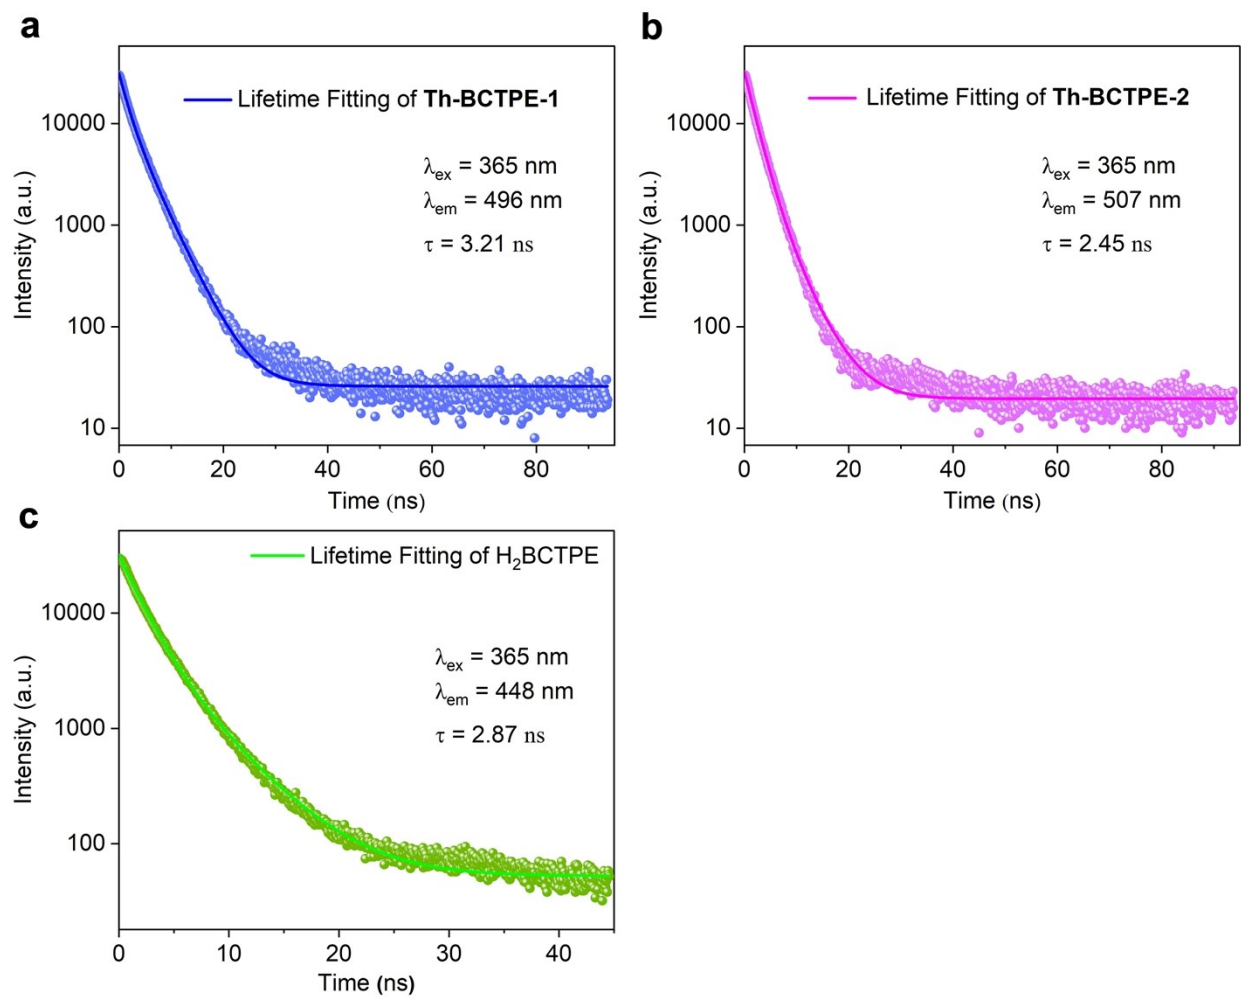

**Fig. S5** Photoluminescence lifetimes of Th-BCTPE-1, Th-BCTPE-2, and H<sub>2</sub>BCTPE.

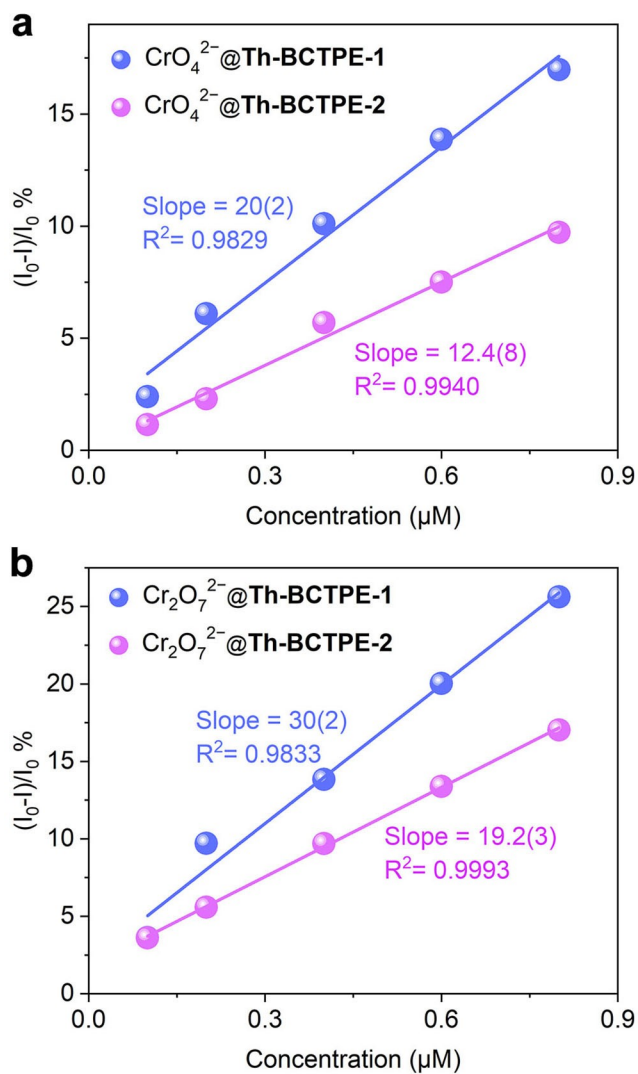

**Fig. S6** The quenching rates of Th-BCTPE-1 and Th-BCTPE-2 as a function of (a)  $\text{CrO}_4^{2-}$  and (b)  $\text{Cr}_2\text{O}_7^{2-}$  concentration (0.1 – 0.9  $\mu\text{M}$ ).

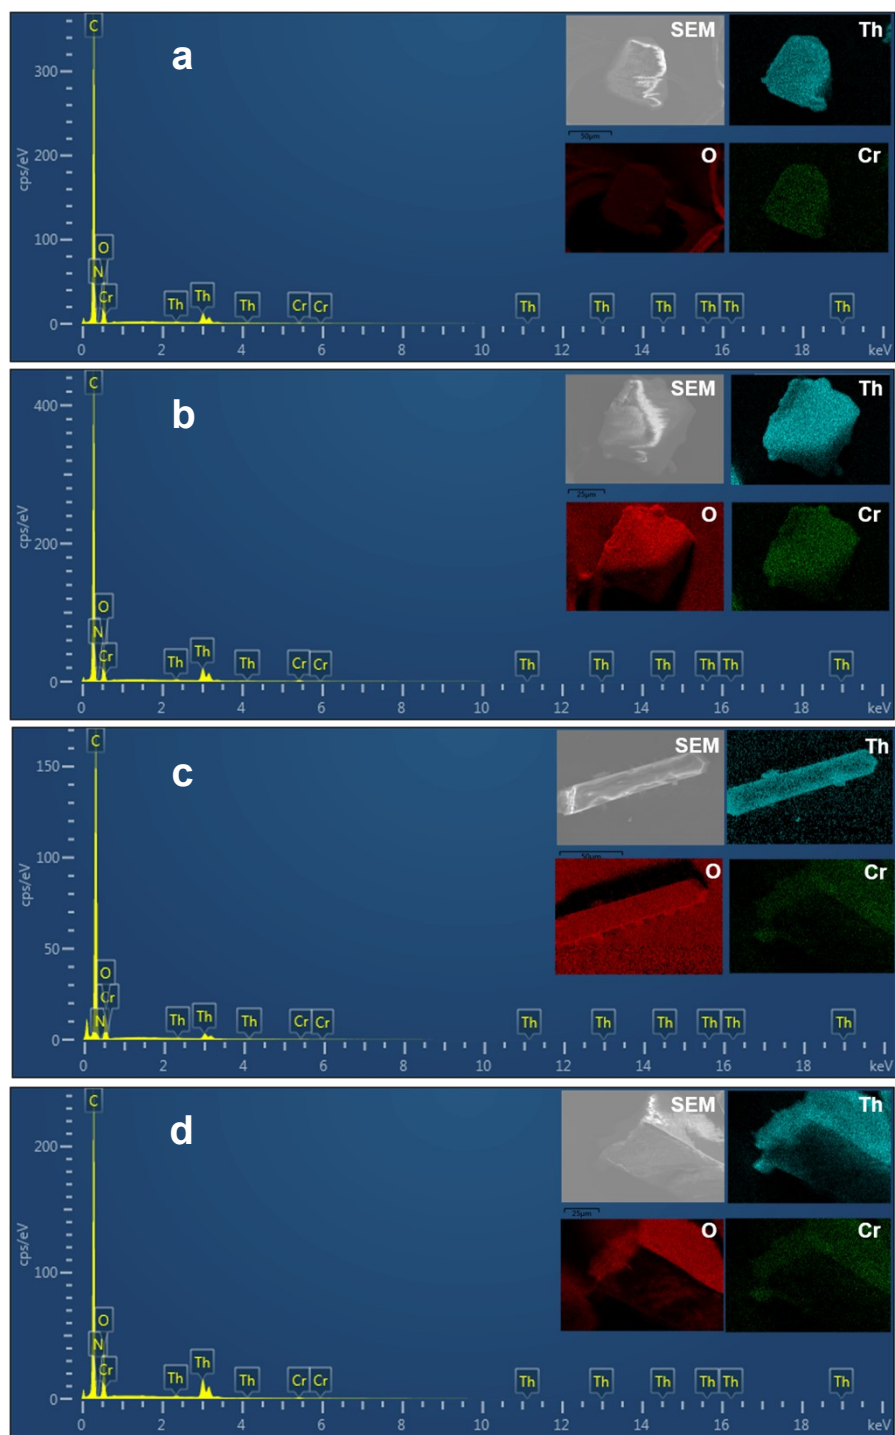

**Fig. S7** (a) SEM–EDS mapping and spectrum of  $\text{CrO}_4^{2-}$  soaked **Th-BCTPE-1**. (b) SEM–EDS mapping and spectrum of  $\text{Cr}_2\text{O}_7^{2-}$  soaked **Th-BCTPE-1**. (c) SEM–EDS mapping and spectrum of  $\text{CrO}_4^{2-}$  soaked **Th-BCTPE-2**. (d) SEM–EDS mapping and spectrum of  $\text{Cr}_2\text{O}_7^{2-}$  soaked **Th-BCTPE-2**.

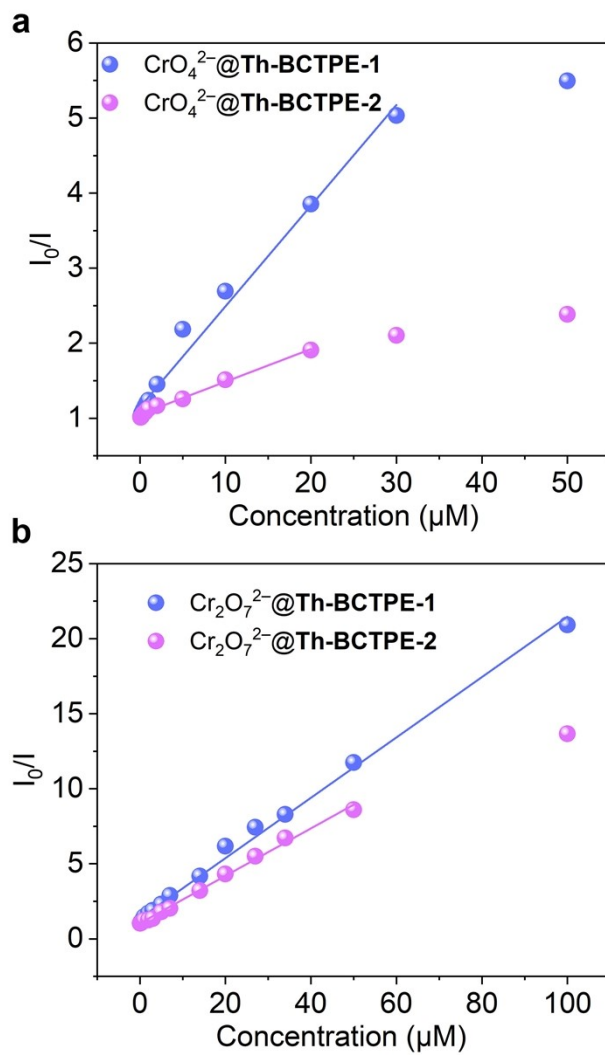

**Fig. S8** The correlations of  $I_0/I$  as a function of (a)  $\text{CrO}_4^{2-}$  and (b)  $\text{Cr}_2\text{O}_7^{2-}$  concentrations at high concentration region.

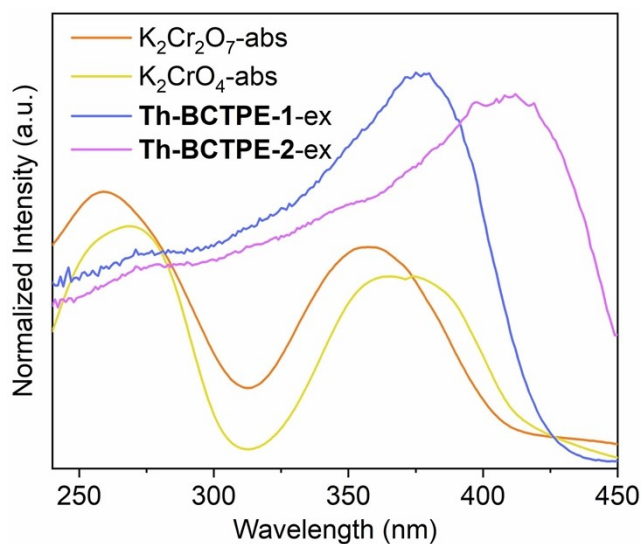

**Fig. S9** The absorption spectra of  $\text{K}_2\text{CrO}_4$  /  $\text{K}_2\text{Cr}_2\text{O}_7$  solution and the excitation spectra of **Th-BCTPE-1** and **Th-BCTPE-2**.

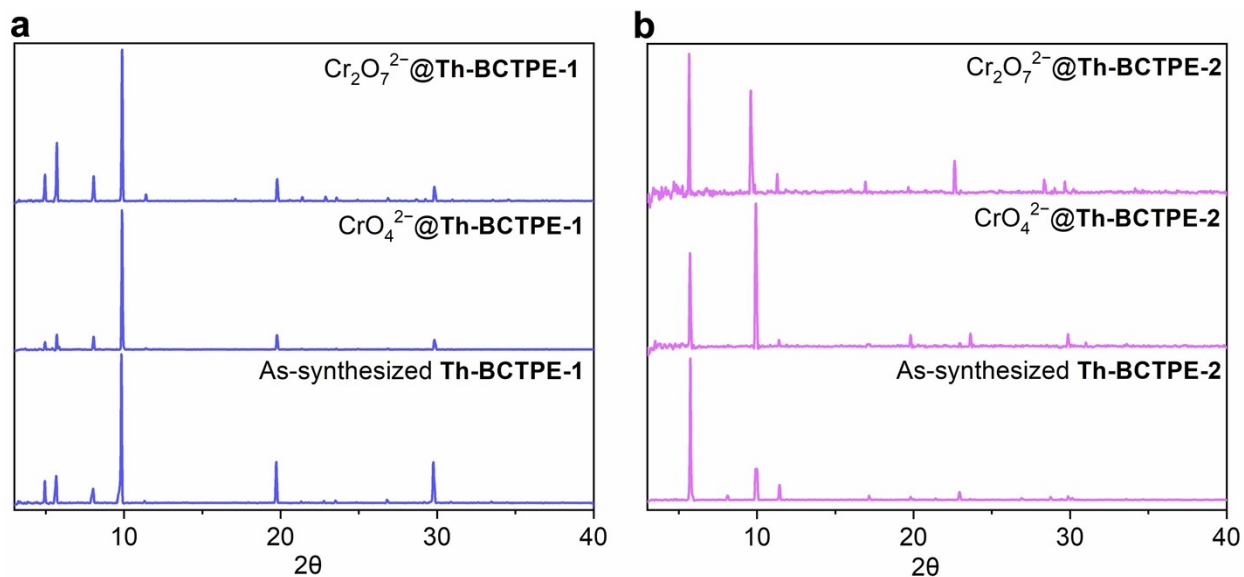

**Fig. S10** Powder X-ray diffraction patterns of as-synthesized,  $\text{CrO}_4^{2-}$  soaked, and  $\text{Cr}_2\text{O}_7^{2-}$  soaked (a) **Th-BCTPE-1** and (b) **Th-BCTPE-2**.



**Table S1** Crystallographic data for **Th-BCTPE-1** and **Th-BCTPE-2**.

| Code                                                                              | <b>Th-BCTPE-1</b>                                                  | <b>Th-BCTPE-2</b>                                                |
|-----------------------------------------------------------------------------------|--------------------------------------------------------------------|------------------------------------------------------------------|
| CCDC No.                                                                          | 2213561                                                            | 2213562                                                          |
| formula                                                                           | C <sub>336</sub> H <sub>216</sub> O <sub>76</sub> Th <sub>12</sub> | C <sub>141</sub> H <sub>91</sub> O <sub>36</sub> Th <sub>6</sub> |
| formula weight                                                                    | 8253.55                                                            | 3753.37                                                          |
| habit                                                                             | octahedron                                                         | needle                                                           |
| space Group                                                                       | <i>Fm-3m</i>                                                       | <i>P4<sub>2</sub>/mmc</i>                                        |
| <i>a</i> (Å)                                                                      | 31.000(5)                                                          | 26.574(3)                                                        |
| <i>b</i> (Å)                                                                      | 31.000(5)                                                          | 26.574(3)                                                        |
| <i>c</i> (Å)                                                                      | 31.000(5)                                                          | 22.081(2)                                                        |
| <i>α</i>                                                                          | 90                                                                 | 90                                                               |
| <i>β</i>                                                                          | 90                                                                 | 90                                                               |
| <i>γ</i>                                                                          | 90                                                                 | 90                                                               |
| <i>V</i> (Å <sup>3</sup> )                                                        | 29790(13)                                                          | 15593(3)                                                         |
| <i>Z</i>                                                                          | 2                                                                  | 2                                                                |
| T (K)                                                                             | 120                                                                | 120                                                              |
| <i>λ</i> (Å)                                                                      | 0.71073                                                            | 0.71073                                                          |
| Max. 2 <i>θ</i> (°)                                                               | 62.958                                                             | 63.11                                                            |
| <i>ρ</i> <sub>calcd</sub> (g cm <sup>-3</sup> )                                   | 0.920                                                              | 0.799                                                            |
| <i>μ</i> (mm <sup>-1</sup> )                                                      | 3.024                                                              | 2.884                                                            |
| <i>GoF</i> on F <sup>2</sup>                                                      | 1.081                                                              | 1.025                                                            |
| <i>R</i> <sub>1</sub> , <i>wR</i> <sub>2</sub> [ <i>I</i> > 2σ( <i>I</i> )]       | 0.0944, 0.2532                                                     | 0.0977, 0.2678                                                   |
| <i>R</i> <sub>1</sub> , <i>wR</i> <sub>2</sub> (all data)                         | 0.1373, 0.2845                                                     | 0.1477, 0.2971                                                   |
| ( <i>Δρ</i> ) <sub>max</sub> , ( <i>Δρ</i> ) <sub>min</sub> /e (Å <sup>-3</sup> ) | 1.59/-2.10                                                         | 4.79, -5.02                                                      |

**Table S2** Fitting results of the Cr(VI) sorption isotherms of **Th-BCTPE-1** and **Th-BCTPE-2** according to the Langmuir and Freundlich models.

| Sample                                                           | Langmuir model  |                           |                | Freundlich model |       |                |
|------------------------------------------------------------------|-----------------|---------------------------|----------------|------------------|-------|----------------|
|                                                                  | $Q_m$ (mol/mol) | $K_L$ (mM <sup>-1</sup> ) | R <sup>2</sup> | $k_F$ (mol/mol)  | $n$   | R <sup>2</sup> |
| CrO <sub>4</sub> <sup>2-</sup> @ <b>Th-BCTPE-1</b>               | 1.5830          | 276.07                    | 0.9977         | 1.7055           | 17.43 | 0.8781         |
| Cr <sub>2</sub> O <sub>7</sub> <sup>2-</sup> @ <b>Th-BCTPE-1</b> | 1.2199          | 43.90                     | 0.9655         | 1.3564           | 5.53  | 0.6778         |
| CrO <sub>4</sub> <sup>2-</sup> @ <b>Th-BCTPE-2</b>               | 1.0493          | 60.05                     | 0.9907         | 1.1671           | 7.05  | 0.8500         |
| Cr <sub>2</sub> O <sub>7</sub> <sup>2-</sup> @ <b>Th-BCTPE-2</b> | 0.9267          | 81.77                     | 0.9635         | 1.1495           | 5.18  | 0.8178         |

**Table S3** The  $K_{SV}$  and LODs of selected MOF based sensors for chromate or dichromate.

| MOFs                                                                                                                         | analyte                                      | $K_{SV}$ ( $M^{-1}$ )             | LOD (M)                        |
|------------------------------------------------------------------------------------------------------------------------------|----------------------------------------------|-----------------------------------|--------------------------------|
| [Zn <sub>2</sub> (tpeb) <sub>2</sub> (2,3-ndc) <sub>2</sub> ] $\cdot$ H <sub>2</sub> O <sup>1</sup>                          | CrO <sub>4</sub> <sup>2-</sup>               | N/A                               | 7.23 $\times$ 10 <sup>-9</sup> |
|                                                                                                                              | Cr <sub>2</sub> O <sub>7</sub> <sup>2-</sup> | N/A                               | 8.58 $\times$ 10 <sup>-9</sup> |
| Cd(TPA)(BIYB) <sup>1</sup>                                                                                                   | Cr <sub>2</sub> O <sub>7</sub> <sup>2-</sup> | 1.4 $\times$ 10 <sup>7</sup>      | 2.4 $\times$ 10 <sup>-7</sup>  |
|                                                                                                                              | CrO <sub>4</sub> <sup>2-</sup>               |                                   | 1.3 $\times$ 10 <sup>-7</sup>  |
| Zn <sub>2</sub> (H <sub>2</sub> BCA) <sub>2</sub> (o-bimb) <sub>2</sub> (H <sub>2</sub> O) <sub>2</sub> <sup>1</sup>         | Cr <sub>2</sub> O <sub>7</sub> <sup>2-</sup> | 6.6 $\times$ 10 <sup>4</sup>      | 7.0 $\times$ 10 <sup>-8</sup>  |
|                                                                                                                              | CrO <sub>4</sub> <sup>2-</sup>               |                                   | 1.4 $\times$ 10 <sup>-7</sup>  |
| [Zn(H <sub>2</sub> BCA)(m-bib)] $\cdot$ H <sub>2</sub> O <sup>1</sup>                                                        | Cr <sub>2</sub> O <sub>7</sub> <sup>2-</sup> | 5.3 $\times$ 10 <sup>4</sup>      | 7.0 $\times$ 10 <sup>-8</sup>  |
|                                                                                                                              | CrO <sub>4</sub> <sup>2-</sup>               | 6.1 $\times$ 10 <sup>5</sup>      | 3.0 $\times$ 10 <sup>-8</sup>  |
| [Zn <sub>2</sub> (BDC) <sub>1.5</sub> (L <sub>16</sub> )(DMF)] $\cdot$ 1.5DMF <sup>1</sup>                                   | Cr <sub>2</sub> O <sub>7</sub> <sup>2-</sup> | 1.0 $\times$ 10 <sup>6</sup>      | 2.0 $\times$ 10 <sup>-8</sup>  |
|                                                                                                                              | CrO <sub>4</sub> <sup>2-</sup>               |                                   |                                |
| Hf-MOF-1 <sup>2</sup>                                                                                                        | Cr <sub>2</sub> O <sub>7</sub> <sup>2-</sup> | 7.1 $\times$ 10 <sup>4</sup>      | 1.38 $\times$ 10 <sup>-7</sup> |
| Hf-MOF-2 <sup>2</sup>                                                                                                        | Cr <sub>2</sub> O <sub>7</sub> <sup>2-</sup> | 4.6 $\times$ 10 <sup>4</sup>      | 1.38 $\times$ 10 <sup>-7</sup> |
| Hf-MOF-3 <sup>2</sup>                                                                                                        | Cr <sub>2</sub> O <sub>7</sub> <sup>2-</sup> | 4.5 $\times$ 10 <sup>5</sup>      | 1.3 $\times$ 10 <sup>-8</sup>  |
| [Zn <sub>2</sub> (tpeb)(bpdc) <sub>2</sub> ] <sup>3</sup>                                                                    | CrO <sub>4</sub> <sup>2-</sup>               | 1.085 $\times$ 10 <sup>4</sup>    | 1.07 $\times$ 10 <sup>-6</sup> |
|                                                                                                                              | Cr <sub>2</sub> O <sub>7</sub> <sup>2-</sup> | 1.122 $\times$ 10 <sup>4</sup>    | 1.04 $\times$ 10 <sup>-6</sup> |
| [Zr <sub>6</sub> O <sub>4</sub> (OH) <sub>8</sub> (H <sub>2</sub> O) <sub>4</sub> (sbtc) <sub>2</sub> ](BUT-28) <sup>4</sup> | Cr <sub>2</sub> O <sub>7</sub> <sup>2-</sup> | 1.122 $\times$ 10 <sup>5</sup>    | 1.7 $\times$ 10 <sup>-6</sup>  |
| Zr <sub>6</sub> (OH) <sub>16</sub> (TBAPy) <sub>2</sub> (NU-1000) <sup>5</sup>                                               | Cr <sub>2</sub> O <sub>7</sub> <sup>2-</sup> | 1.34 $\times$ 10 <sup>4</sup>     | 1.8 $\times$ 10 <sup>-6</sup>  |
| Zr <sub>6</sub> O <sub>4</sub> (OH) <sub>7</sub> (H <sub>2</sub> O) <sub>3</sub> (BTBA) <sub>3</sub> (BUT-39) <sup>6</sup>   | Cr <sub>2</sub> O <sub>7</sub> <sup>2-</sup> | 1.57 $\times$ 10 <sup>4</sup>     | 1.5 $\times$ 10 <sup>-6</sup>  |
| <b>Th-BCTPE-1</b>                                                                                                            | CrO <sub>4</sub> <sup>2-</sup>               | 2.4(1) $\times$ 10 <sup>5</sup>   | 9.0 $\times$ 10 <sup>-9</sup>  |
|                                                                                                                              | Cr <sub>2</sub> O <sub>7</sub> <sup>2-</sup> | 4.63(3) $\times$ 10 <sup>5</sup>  | 1.59 $\times$ 10 <sup>-7</sup> |
| <b>Th-BCTPE-2</b>                                                                                                            | CrO <sub>4</sub> <sup>2-</sup>               | 1.30(7) $\times$ 10 <sup>5</sup>  | 4.6 $\times$ 10 <sup>-9</sup>  |
|                                                                                                                              | Cr <sub>2</sub> O <sub>7</sub> <sup>2-</sup> | 2.222(9) $\times$ 10 <sup>5</sup> | 9.4 $\times$ 10 <sup>-8</sup>  |

**Table S4** Calculations of LOD of **Th-BCTPE-1** and **Th-BCTPE-2**.

| Sample                             | $k_{SV}$ ( $M^{-1}$ ) | $\sigma$ | LOD = $3\sigma/\text{slope}$ (nM) |
|------------------------------------|-----------------------|----------|-----------------------------------|
| $CrO_4^{2-}$ @ <b>Th-BCTPE-1</b>   | $2.4 \times 10^5$     | 0.00071  | 9.0                               |
| $Cr_2O_7^{2-}$ @ <b>Th-BCTPE-1</b> | $4.6 \times 10^5$     | 0.00071  | 4.6                               |
| $CrO_4^{2-}$ @ <b>Th-BCTPE-2</b>   | $1.30 \times 10^5$    | 0.0069   | 159                               |
| $Cr_2O_7^{2-}$ @ <b>Th-BCTPE-2</b> | $2.222 \times 10^5$   | 0.0069   | 94                                |

### Supplementary References

1. B. Parmar, K. K. Bisht, Y. Rachuri and E. Suresh, *Inorg. Chem. Front.*, 2020, **7**, 1082.
2. K. Wu, J. Zheng, Y.-L. Huang, D. Luo, Y. Y. Li, W. Lu and D. Li, *J. Mater. Chem. C*, 2020, **8**, 16974.
3. B. B. Rath and J. J. Vittal, *Inorg. Chem.*, 2020, **59**, 8818.
4. M.-M. Xu, X.-J. Kong, T. He, X.-Q. Wu, L.-H. Xie and J.-R. Li, *Inorg. Chem.*, 2018, **57**, 14260.
5. Z.-J. Lin, H.-Q. Zheng, H.-Y. Zheng, L.-P. Lin, Q. Xin and R. Cao, *Inorg. Chem.*, 2017, **56**, 14178.
6. T. He, Y.-Z. Zhang, X.-J. Kong, J. Yu, X.-L. Lv, Y. Wu, Z.-J. Guo and J.-R. Li, *ACS Appl. Mater. Interfaces*, 2018, **10**, 16650.
